# Supplementary material for: Rare-Earth Element Phase Associations in Four West Virginia Coal Samples
Source: MDPI journal article supplement (doi:10.3390/min14040362), 2024-03-29
Supplement: s1 [file s1]

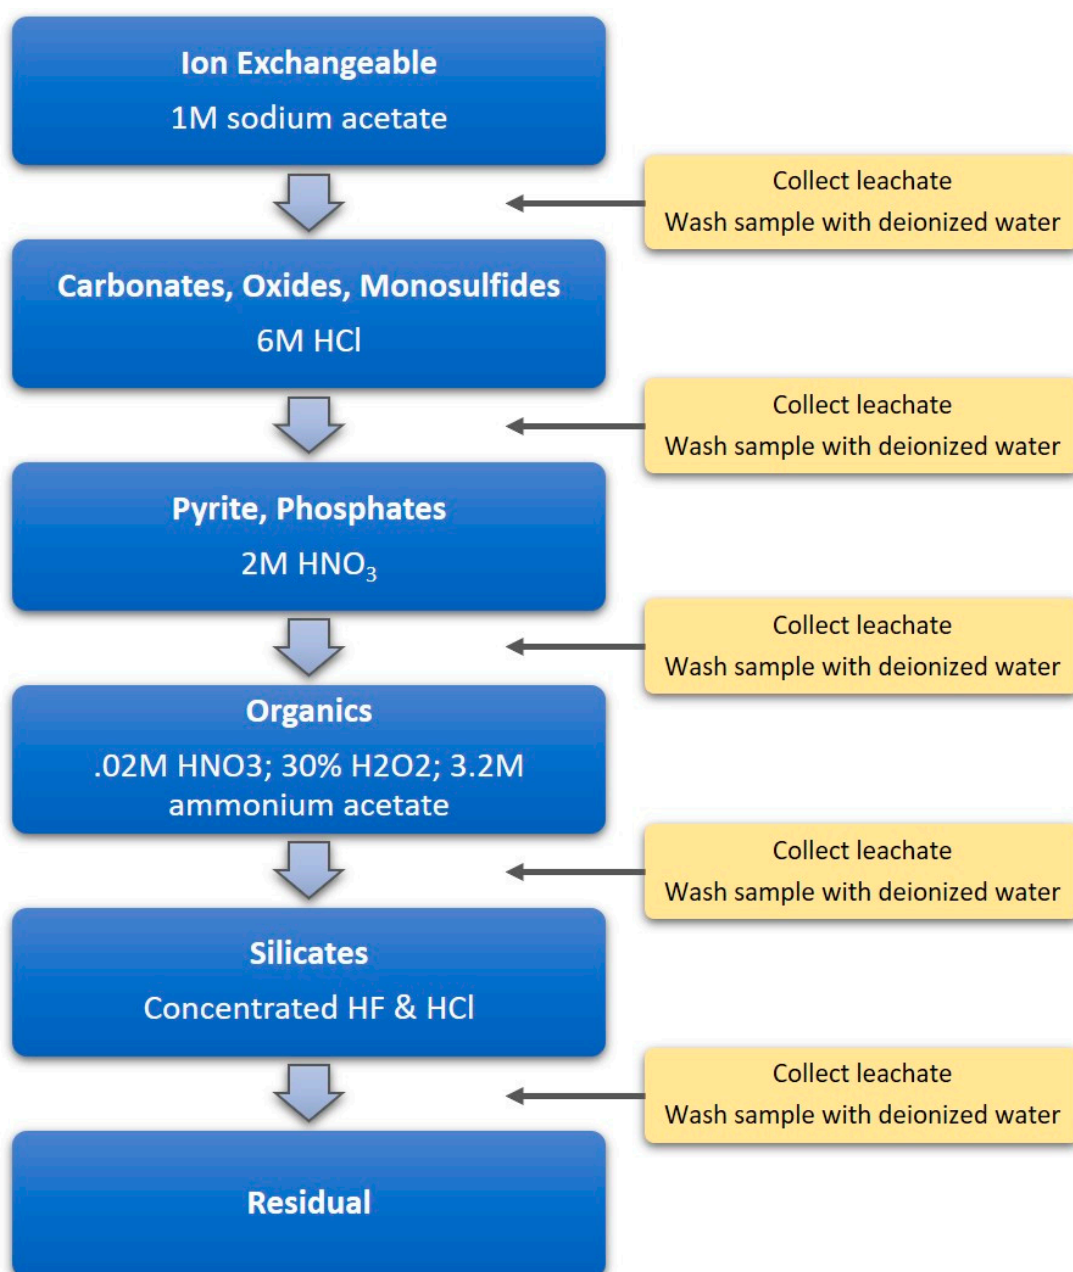

**Figure S1.** Simplified flow diagram of the sequential leaching procedure.

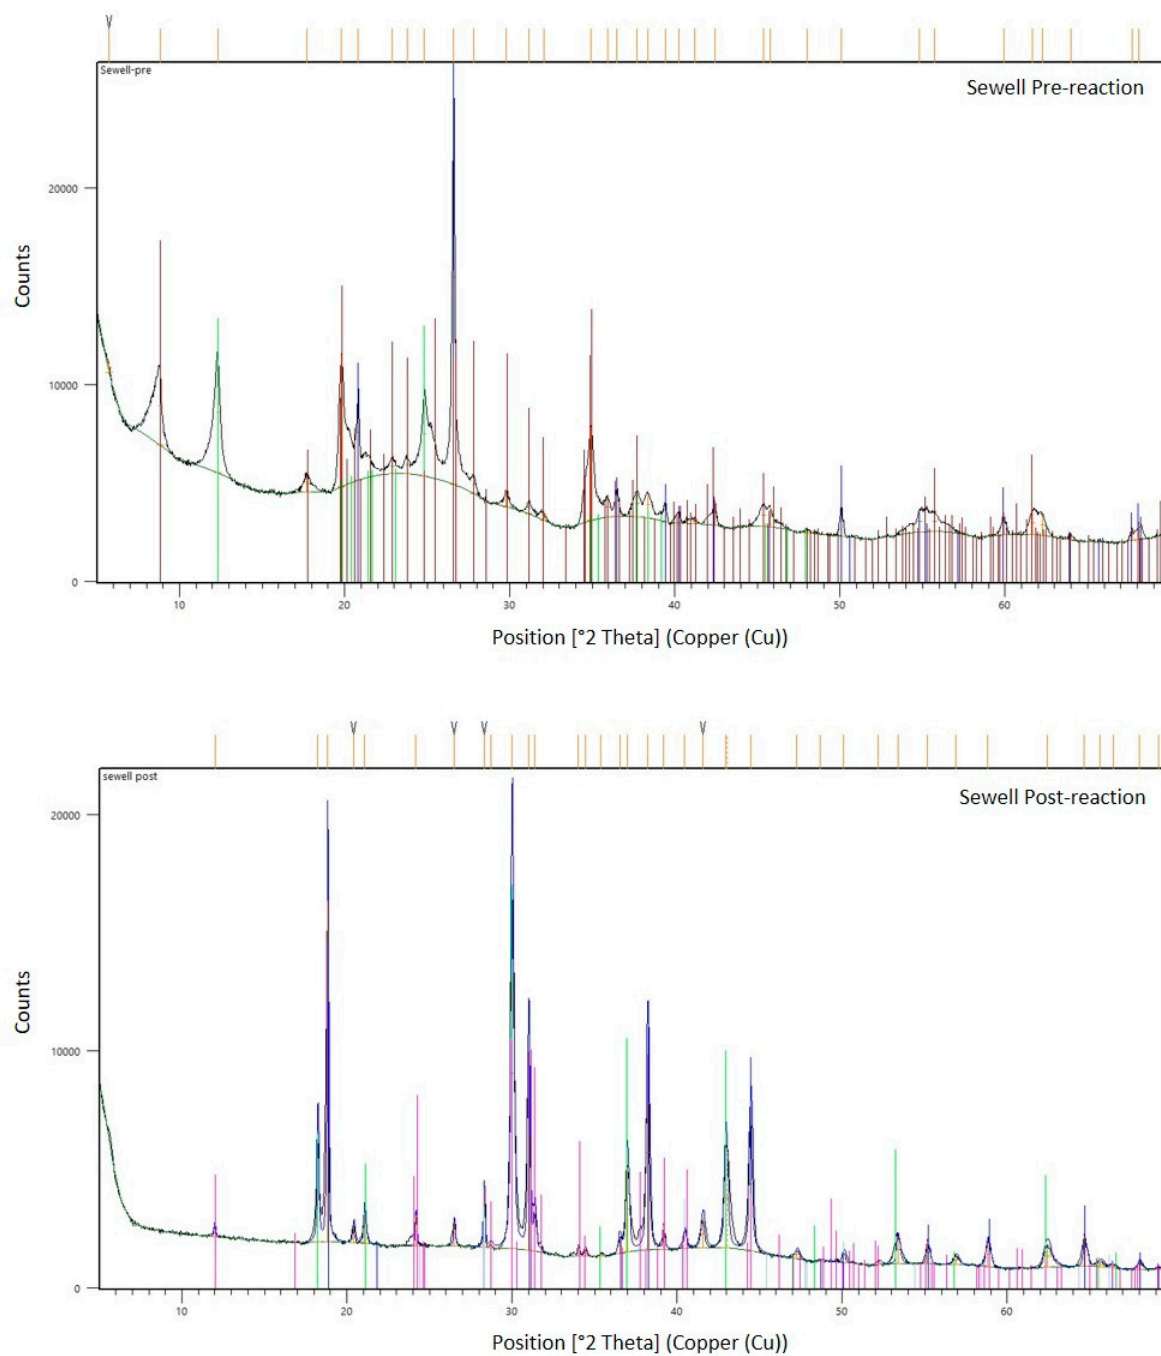

Figure S2A. X-ray diffraction patterns of the pre- and post-reaction samples (Sewell)

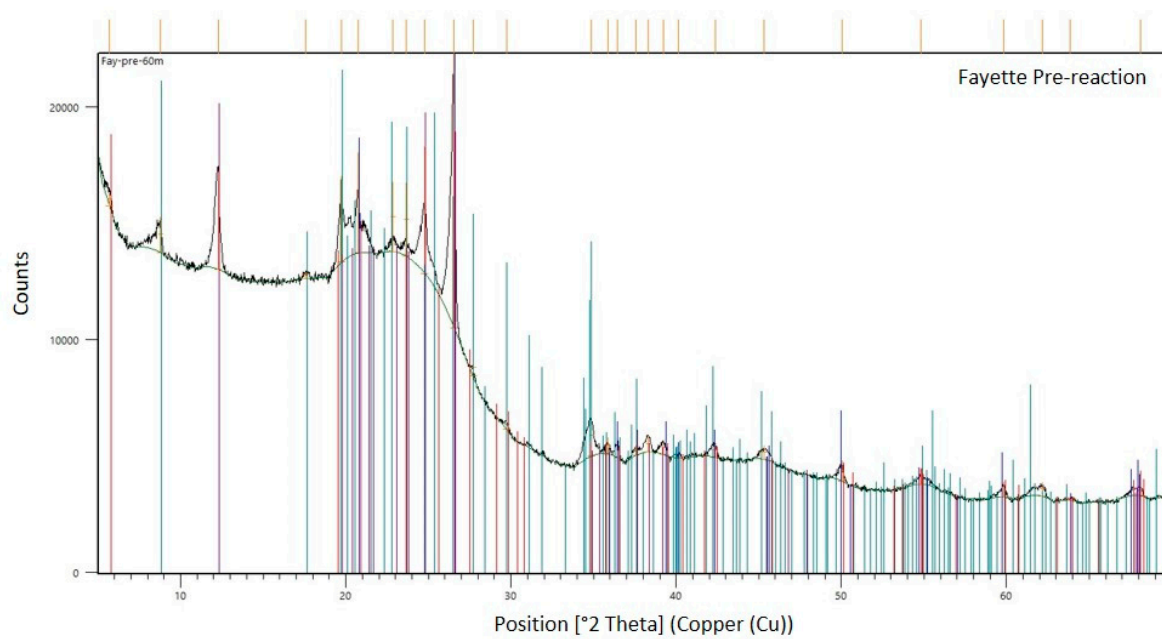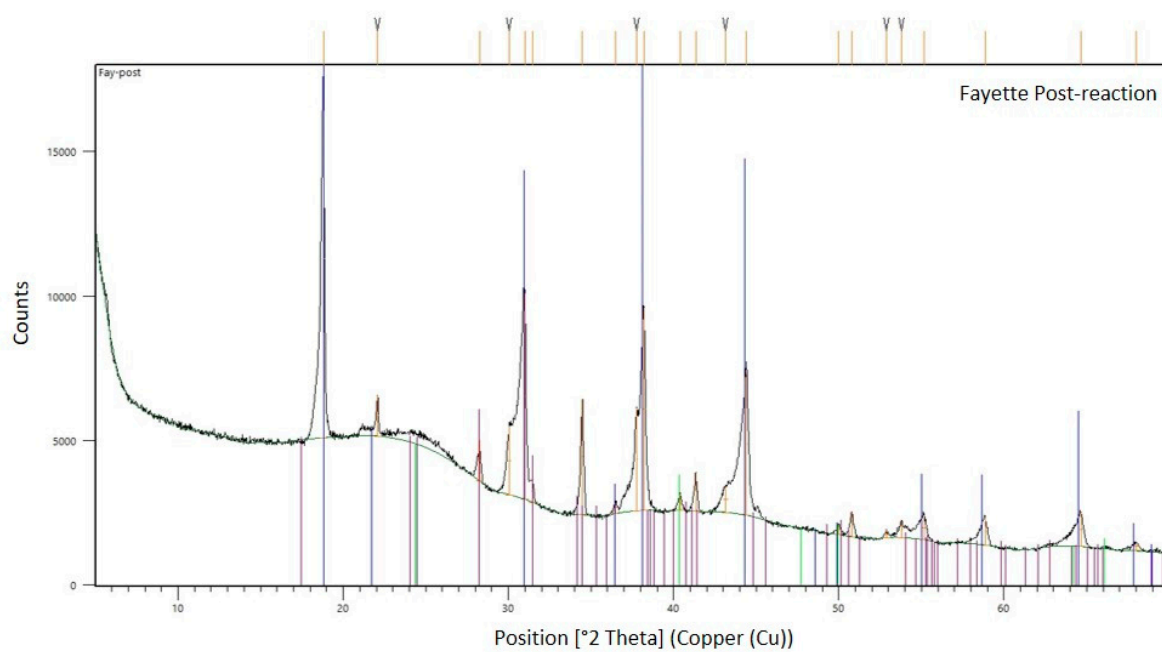

Figure S2B. X-ray diffraction patterns of the pre- and post-reaction samples (Fayette)

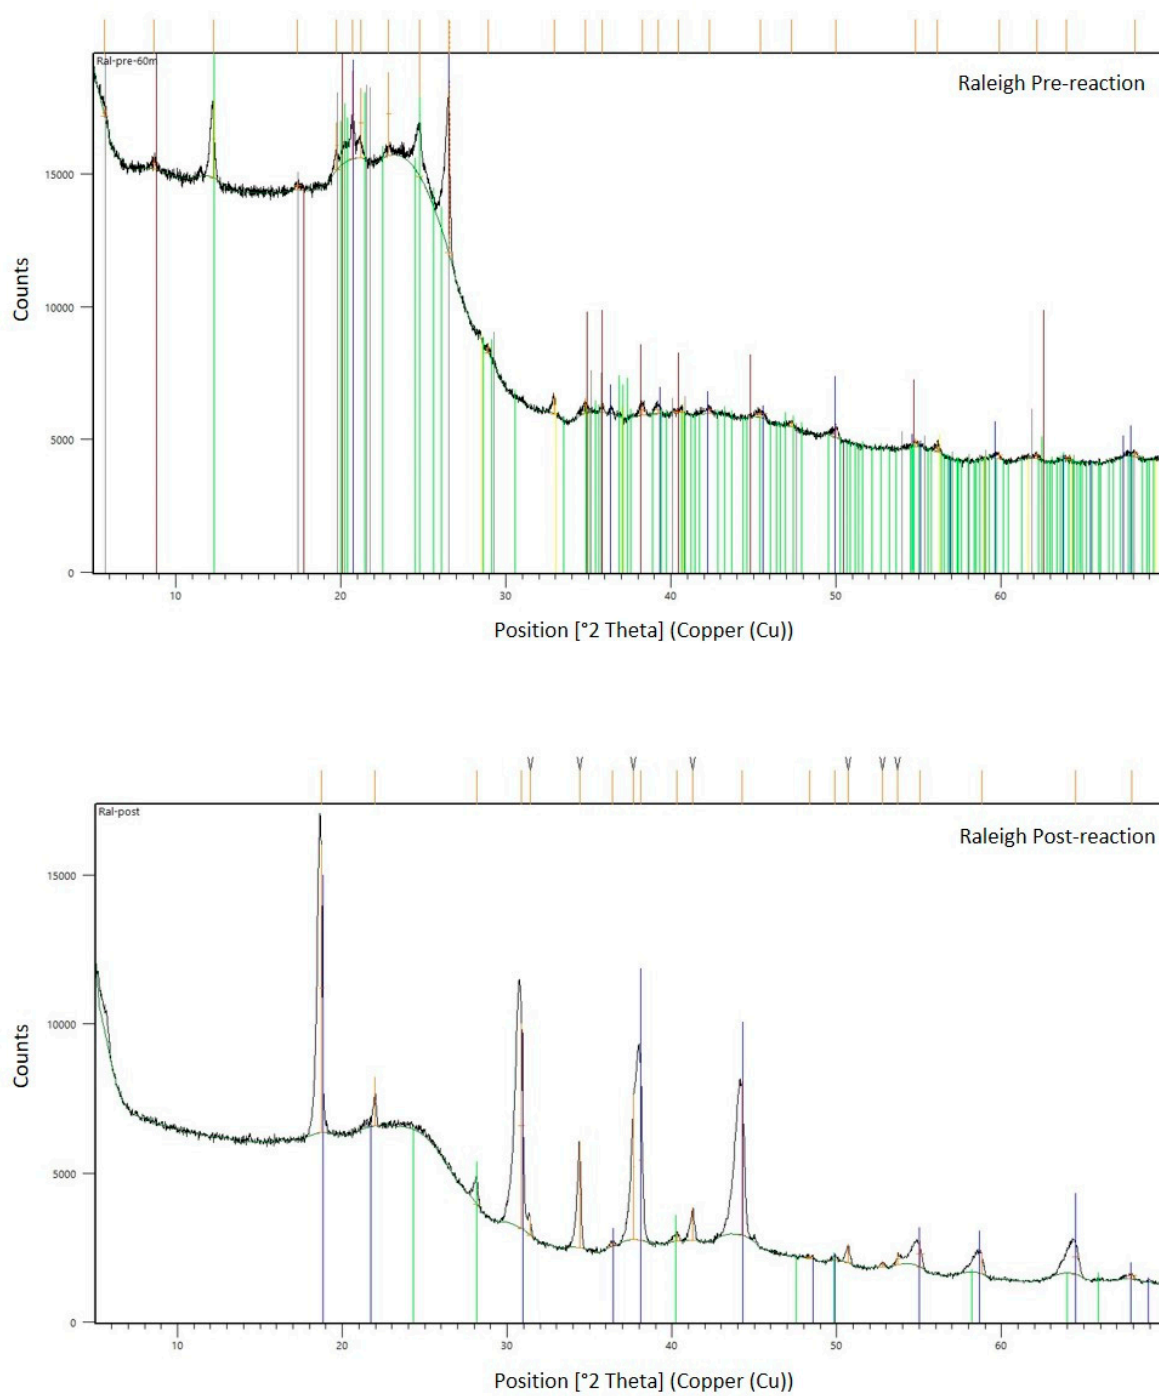

Figure S2C. X-ray diffraction patterns of the pre- and post-reaction samples (Raleigh)

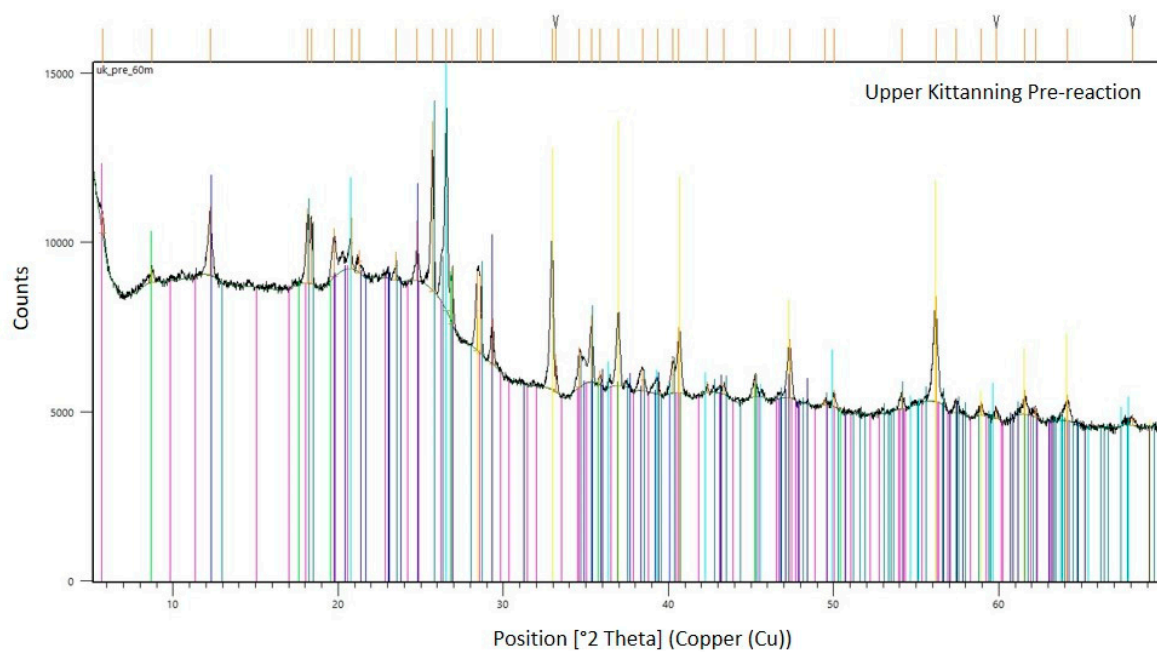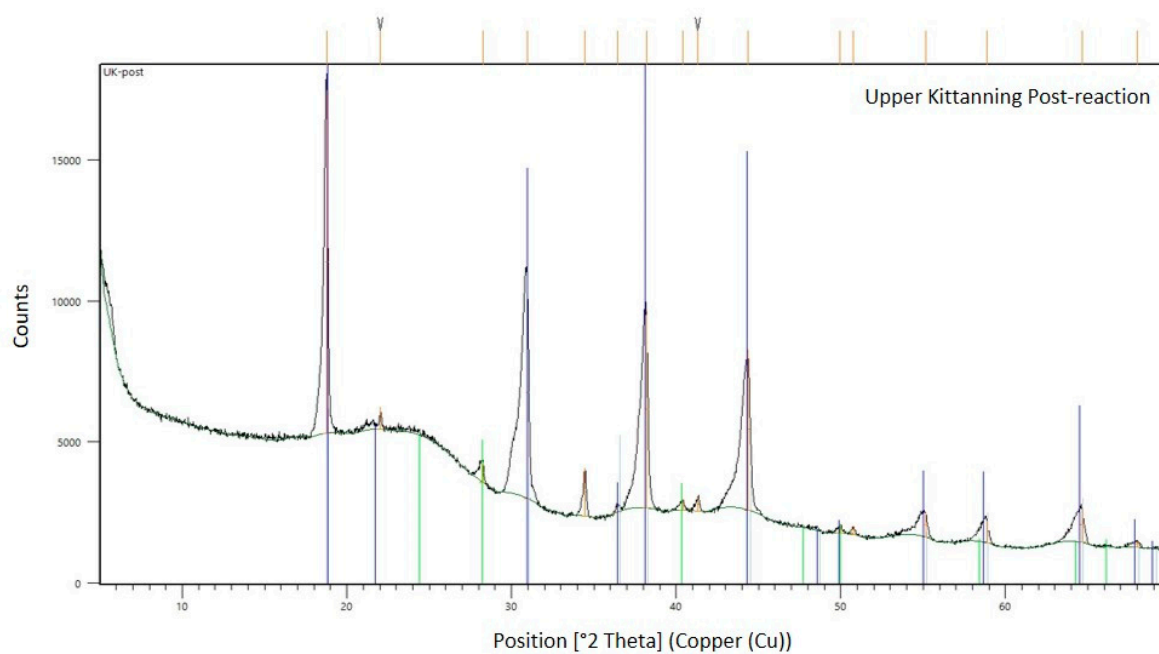

Figure S2 D. X-ray diffraction patterns of the pre- and post-reaction samples (Upper Kittanning)





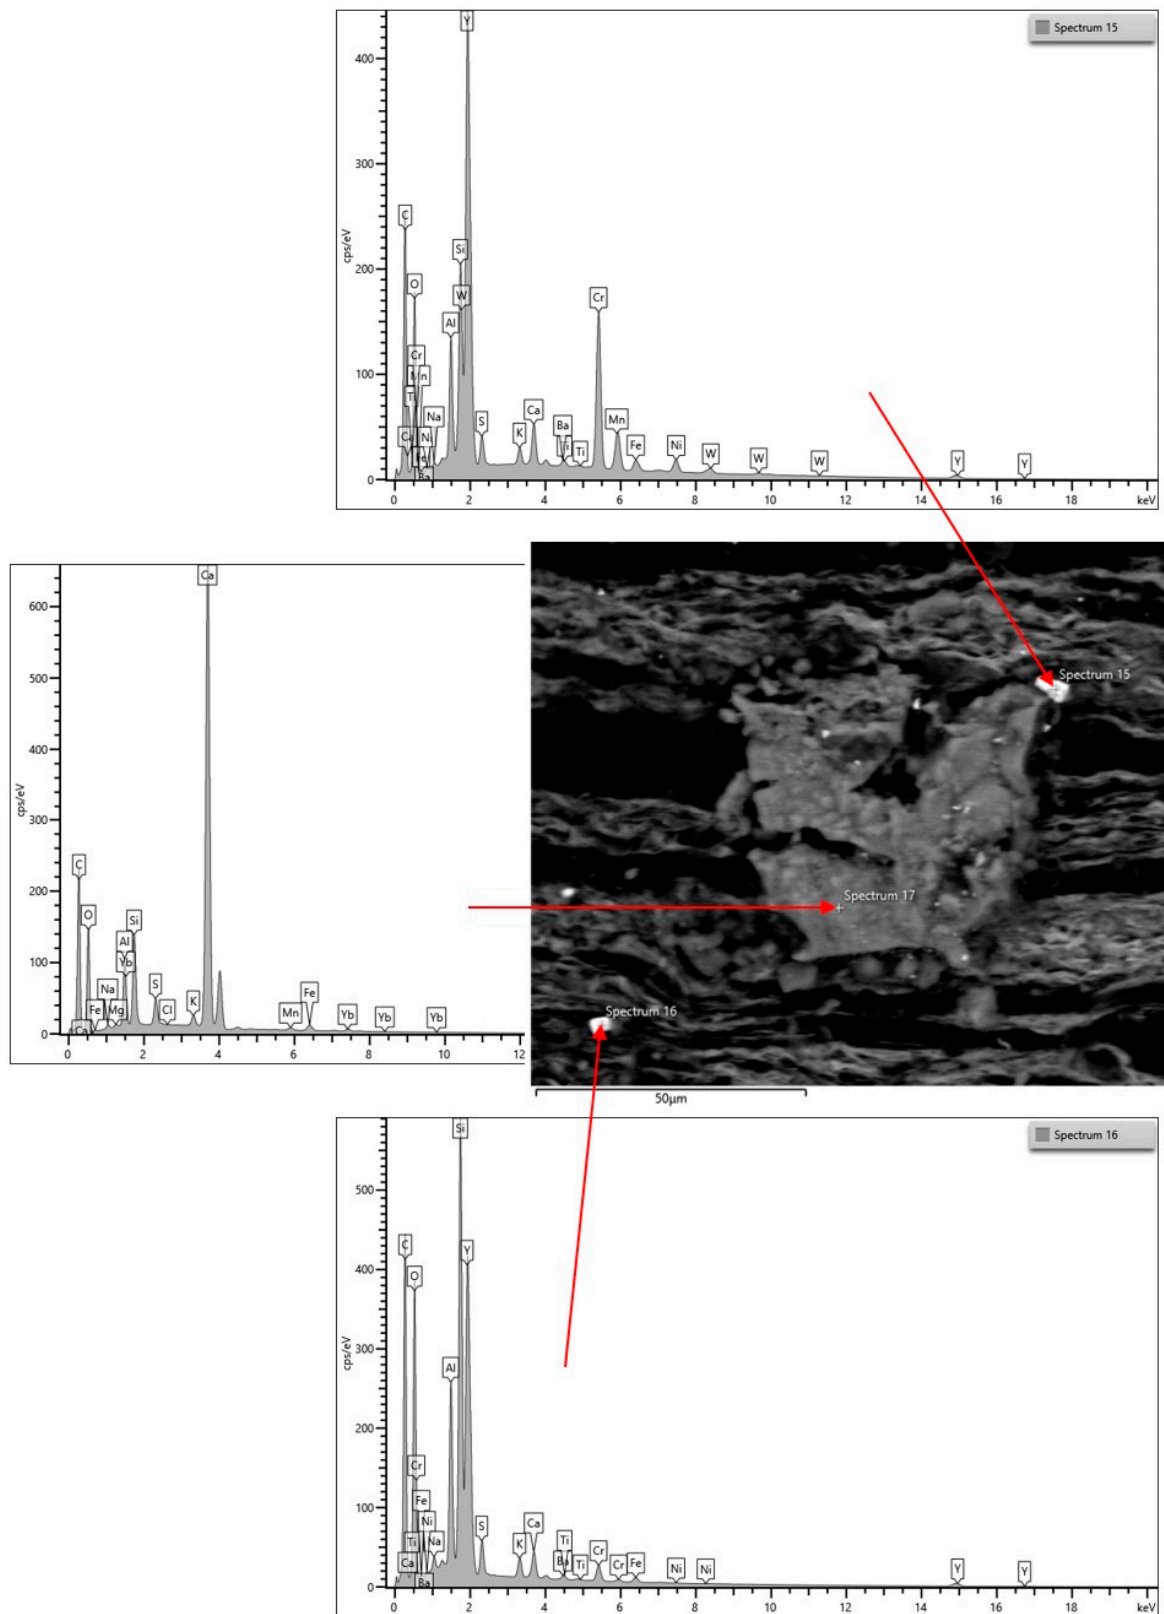

Figure S3B. EDS peaks for some REY-bearing minerals in the Sewell sample.

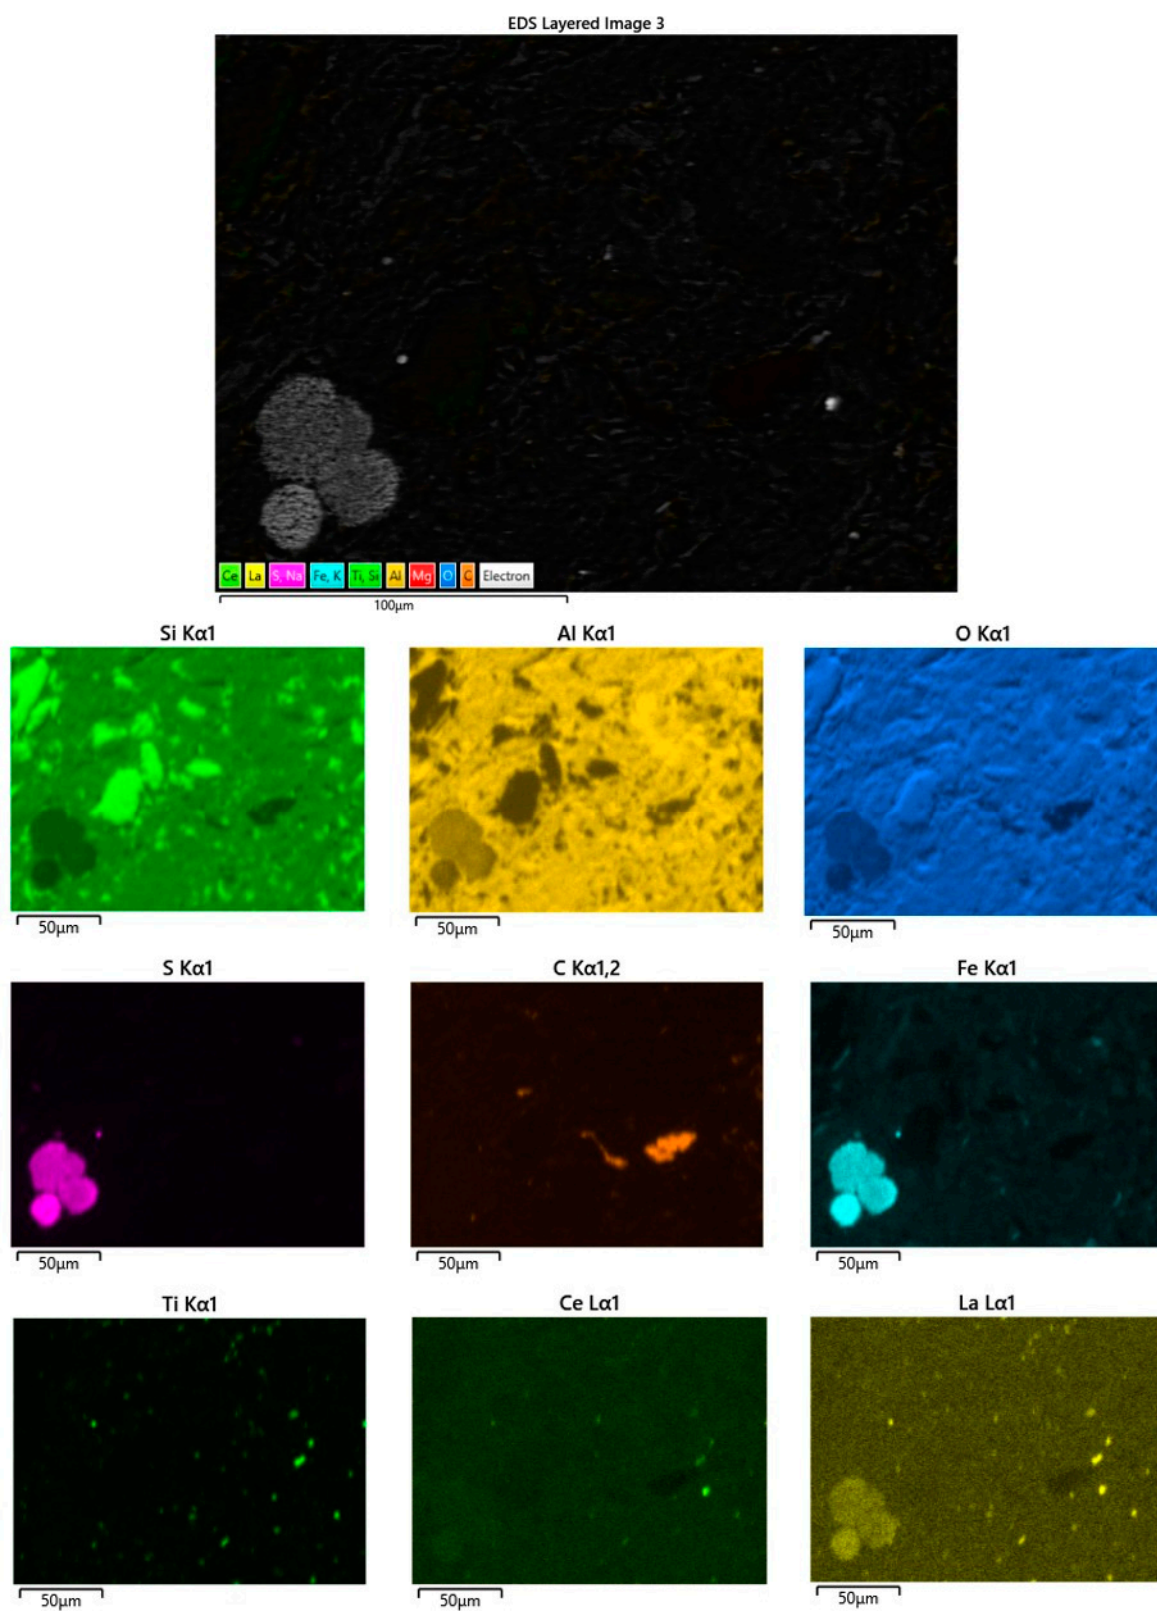

**Figure S4A.** EDS maps of some REY-bearing minerals in the Upper Kittanning sample.



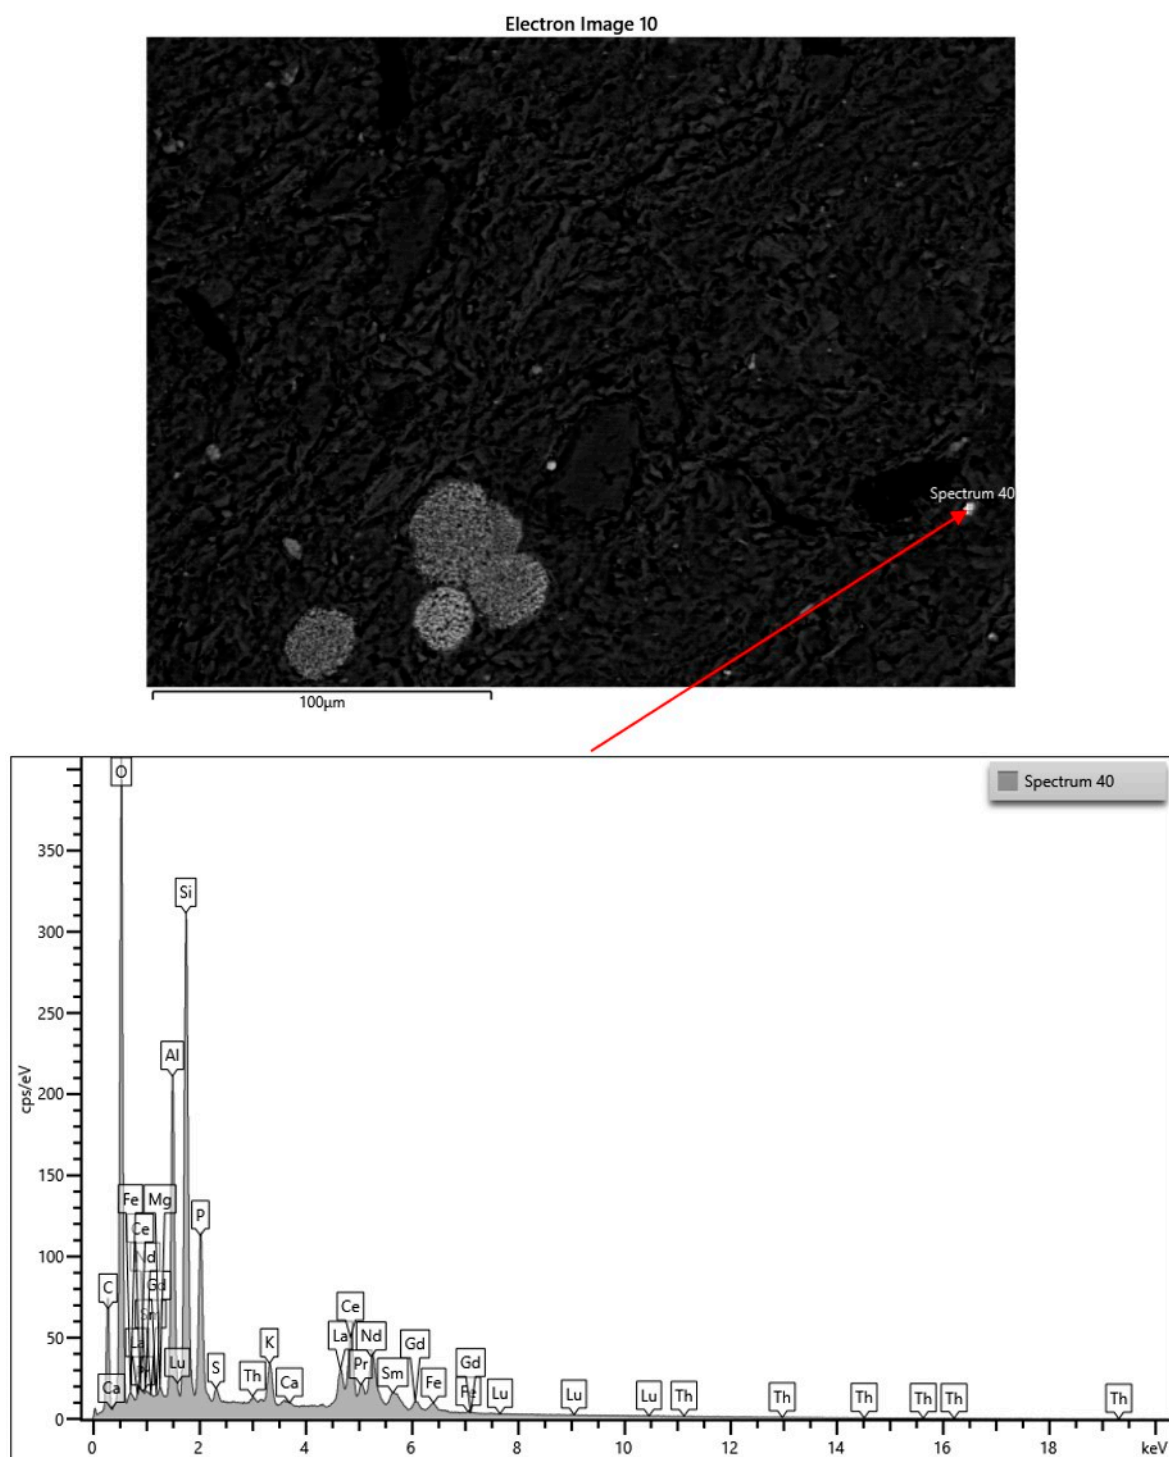

**Figure S4B.** EDS peaks for an REY-bearing mineral (monazite) in the Upper Kittanning sample.
